# Supplementary material
Source: publisher figshare collection journal article supplement (https://tandf.figshare.com/ndownloader/files/16406537)
Supplement: Supplementary file 1 [file 16406537]

## Sheet: Calculator
ENTER RAW SCORE HERE ->	Raw Score	Scaled Score		T-Score		Age (60-89)	Education (12-20)	Sex (male-0, female-1)
Trial 1 (0-16)	10	15		68.0048		60	12	0					T1	50+10*(((CVLT T1 scaled score)-(13.22-10.20*(age/100)+1.88*(edu/10)+1.11*sex))/(2.72-0.16*(age/100)-0.08*(edu/10)-0.18*sex))/1.24
Trial 2 (0-16)	10	11		58.822									T2	50+10*(((CVLT T2 scaled score)-(14.93-13.50*(age/100)+2.00*(edu/10)+1.67*sex))/(-0.66+1.97*(age/100)+0.97*(edu/10)-0.24*sex))/1.19
Trial 3 (0-16)	10	8		44.8524									T3	50+10*(((CVLT T3 scaled score)-(15.62-14.80*(age/100)+2.05*(edu/10)+1.90*sex))/(0.89+0.57*(age/100)+0.54*(edu/10)+0.02*sex))/1.24
Trial 4 (0-16)	10	7		37.9369									T4	50+10*(((CVLT T4 scaled score)-(14.86-12.00*(age/100)+1.40*(edu/10)+1.81*sex))/(-0.60+2.29*(age/100)+0.68*(edu/10)+0.07*sex))/1.22
Trial 5 (0-16)	10	6		31.3897									T5	50+10*(((CVLT T5 scaled score)-(18.18-17.14*(age/100)+1.75*(edu/10)+1.21*sex))/(0.05+0.65*(age/100)+1.10*(edu/10)-0.21*sex))/1.22
Trials 1-5 total	50	9		47.5565									T1-T5	50+10*(((CVLT Tot scaled score)-(16.75-16.18*(age/100)+2.02*(edu/10)+1.78*sex))/(-0.67+2.04*(age/100)+0.82*(edu/10)-0.11*sex))/1.24
SDFR (0-16)	10	8		43.7274									SDFR	50+10*(((SDFR scaled score)-(14.70-13.19*(age/100)+1.98*(edu/10)+1.23*sex))/(0.09-0.28*(age/100)+1.30*(edu/10)+0.28*sex))/1.25
LDFR (0-16)	10	8		44.1934									LDFR	50+10*(((LDFR scaled score)-(13.80-10.57*(age/100)+1.74*(edu/10)+1.21*sex))/(2.25-0.74*(age/100)+0.27*(edu/10)+0.03*sex))/1.25
Hits (0-16)	16	13		57.802									Hits	50+10*(((Hits scaled score)-(15.47-8.48*(age/100)+0.20*(edu/10)+0.38*sex))/(1.59+2.30*(age/100)-0.41*(edu/10)-0.22*sex))/1.23
False Positives (0-36)	5	5		37.5037									FP	50+10*(((FP tot scaled score)-(10.73-7.79*(age/100)+2.28*(edu/10)+1.25*sex))/(2.19+1.12*(age/100)-0.26*(edu/10)-0.06*sex))/1.19
D prime (0.00-5.00)	3	9		47.447									Dprime	50+10*(((D Prime scaled score)-(14.10-9.92*(age/100)+1.35*(edu/10)+0.84*sex))/(2.36+0.21*(age/100)-0.05*(edu/10)-0.08*sex))/1.24

## Sheet: Equations
CVLT T1	50+10*(((CVLT T1 scaled score)-(13.22-10.20*(age/100)+1.88*(edu/10)+1.11*sex))/(2.72-0.16*(age/100)-0.08*(edu/10)-0.18*sex))/1.24
CVLT T2	50+10*(((CVLT T2 scaled score)-(14.93-13.50*(age/100)+2.00*(edu/10)+1.67*sex))/(-0.66+1.97*(age/100)+0.97*(edu/10)-0.24*sex))/1.19
CVLT T3	50+10*(((CVLT T3 scaled score)-(15.62-14.80*(age/100)+2.05*(edu/10)+1.90*sex))/(0.89+0.57*(age/100)+0.54*(edu/10)+0.02*sex))/1.24
CVLT T4	50+10*(((CVLT T4 scaled score)-(14.86-12.00*(age/100)+1.40*(edu/10)+1.81*sex))/(-0.60+2.29*(age/100)+0.68*(edu/10)+0.07*sex))/1.22
CVLT T5	50+10*(((CVLT T5 scaled score)-(18.18-17.14*(age/100)+1.75*(edu/10)+1.21*sex))/(0.05+0.65*(age/100)+1.10*(edu/10)-0.21*sex))/1.22
T1-T5 tot	50+10*(((CVLT Tot scaled score)-(16.75-16.18*(age/100)+2.02*(edu/10)+1.78*sex))/(-0.67+2.04*(age/100)+0.82*(edu/10)-0.11*sex))/1.24
SDFR	50+10*(((SDFR scaled score)-(14.70-13.19*(age/100)+1.98*(edu/10)+1.23*sex))/(0.09-0.28*(age/100)+1.30*(edu/10)+0.28*sex))/1.25
LDFR	50+10*(((LDFR scaled score)-(13.80-10.57*(age/100)+1.74*(edu/10)+1.21*sex))/(2.25-0.74*(age/100)+0.27*(edu/10)+0.03*sex))/1.25
Recog Hits	50+10*(((Hits scaled score)-(15.47-8.48*(age/100)+0.20*(edu/10)+0.38*sex))/(1.59+2.30*(age/100)-0.41*(edu/10)-0.22*sex))/1.23
FP total	50+10*(((FP tot scaled score)-(10.73-7.79*(age/100)+2.28*(edu/10)+1.25*sex))/(2.19+1.12*(age/100)-0.26*(edu/10)-0.06*sex))/1.19
D-prime	50+10*(((D Prime scaled score)-(14.10-9.92*(age/100)+1.35*(edu/10)+0.84*sex))/2.36+0.21*(age/100)-0.05*(edu/10)-0.08*sex))/1.24
Bias	50+10*(((Bias scaled score)-(7.13-0.47*(age/100)+1.65*(edu/10)+0.55*sex))/(0.60+4.01*(age/100)-0.63*(edu/10)-0.03*sex))/1.29

## Sheet: Sheet5
	D-Prime	ss		-5	1
	-5 - 1.0731	1		-4.99	1
				-4.98	1
	1.0732 - 1.3059	2		-4.97	1
	1.306 - 1.4273	3		-4.96	1
	1.4274 - 1.6024	4		-4.95	1
	1.6025 - 1.9961	5		-4.94	1
	1.9962 - 2.4356	6		-4.93	1
	2.4357 - 2.7226	7		-4.92	1
	2.7227 - 2.9304	8		-4.91	1
	2.9305 - 3.261	9		-4.9	1
	3.2611 - 3.5032	10		-4.89	1
	3.5033 - 3.7056	11		-4.88	1
	3.7057 - 3.803	12		-4.87	1
	3.8031 - 3.9529	13		-4.86	1
	3.953 - 4.1208	14		-4.85	1
	4.1209 - 4.302	15		-4.84	1
	4.3021 - 4.4833	16		-4.83	1
	4.4834 - 4.6645	17		-4.82	1
	4.6646 - 4.845	18		-4.81	1
	0 - 1.0731	19		-4.8	1
				-4.79	1
				-4.78	1
				-4.77	1
				-4.76	12
				-4.75	1
				-4.74	1
				-4.73	14
				-4.72	1
				-4.71	1
				-4.7	1
				-4.69	1
				-4.68	1
				-4.67	1
				-4.66	1
				-4.65	1
				-4.64	1
				-4.63	1
				-4.62	1
				-4.61	1
				-4.6	1
				-4.59	1
				-4.58	1
				-4.57	1
				-4.56	1
				-4.55	1
				-4.54	1
				-4.53	1
				-4.52	1
				-4.51	1
				-4.5	1
				-4.49	1
				-4.48	1
				-4.47	1
				-4.46	1
				-4.45	1
				-4.44	1
				-4.43	1
				-4.42	1
				-4.41	1
				-4.4	1
				-4.39	1
				-4.38	1
				-4.37	1
				-4.36	1
				-4.35	1
				-4.34	1
				-4.33	1
				-4.32	1
				-4.31	1
				-4.3	1
				-4.29	1
				-4.28	1
				-4.27	1
				-4.26	1
				-4.25	1
				-4.24	1
				-4.23	1
				-4.22	1
				-4.21	1
				-4.2	1
				-4.19	1
				-4.18	1
				-4.17	1
				-4.16	1
				-4.15	1
				-4.14	1
				-4.13	1
				-4.12	1
				-4.11	1
				-4.1	1
				-4.09	1
				-4.08	1
				-4.07	1
				-4.06	1
				-4.05	1
				-4.04	1
				-4.03	1
				-4.02	1
				-4.01	1
				-4	1
				-3.99	1
				-3.98	1
				-3.97	1
				-3.96	1
				-3.95	1
				-3.94	1
				-3.93	1
				-3.92	1
				-3.91	1
				-3.9	1
				-3.89	1
				-3.88	1
				-3.87	1
				-3.86	1
				-3.85	1
				-3.84	1
				-3.83	1
				-3.82	1
				-3.81	1
				-3.8	1
				-3.79	1
				-3.78	1
				-3.77	1
				-3.76	1
				-3.75	1
				-3.74	1
				-3.73	1
				-3.72	1
				-3.71	1
				-3.7	1
				-3.69	1
				-3.68	1
				-3.67	1
				-3.66	1
				-3.65	1
				-3.64	1
				-3.63	1
				-3.62	1
				-3.61	1
				-3.6	1
				-3.59	1
				-3.58	1
				-3.57	1
				-3.56	1
				-3.55	1
				-3.54	1
				-3.53	1
				-3.52	1
				-3.51	1
				-3.5	1
				-3.49	1
				-3.48	1
				-3.47	1
				-3.46	1
				-3.45	1
				-3.44	1
				-3.43	1
				-3.42	1
				-3.41	1
				-3.4	1
				-3.39	1
				-3.38	1
				-3.37	1
				-3.36	1
				-3.35	1
				-3.34	1
				-3.33	1
				-3.32	1
				-3.31	1
				-3.3	1
				-3.29	1
				-3.28	1
				-3.27	1
				-3.26	1
				-3.25	1
				-3.24	1
				-3.23	1
				-3.22	1
				-3.21	1
				-3.2	1
				-3.19	1
				-3.18	1
				-3.17	1
				-3.16	1
				-3.15	1
				-3.14	1
				-3.13	1
				-3.12	1
				-3.11	1
				-3.1	1
				-3.09	1
				-3.08	1
				-3.07	1
				-3.06	1
				-3.05	1
				-3.04	1
				-3.03	1
				-3.02	1
				-3.01	1
				-3
				-2.99
				-2.98
				-2.97
				-2.96
				-2.95
				-2.94
				-2.93
				-2.92

## Sheet: raw to ss
ss	T1	T2	T3	T4	T5	SDFR	LDFR	Total Hits	ss		T1-T5 Total	ss		Fale Positives	ss		d-prime	ss
19	16	-	-	-	-	-	-	-	19		80	19		0	13		5	19	19	4.85-5
19	15								19		79	19		1	10		4.99	19	18	4.84-4.67
18	14	16							18		78	19		2	8		4.98	19	17	4.66-4.49
18	13	16							18		77	18		3	7		4.97	19	16	4.48-4.30
18	12	16	-	-	-	-	-	-	18		76	18		4	6		4.96	19	15	4.29-4.12
17	-	15	-	-	-	-	-	-	17		75	18		5	5		4.95	19	14	4.11-3.95
											74	18		6	5		4.94	19	13	3.94-3.80
16	11	14	16	-	-	16	-	-	16		73	18		7	4		4.93	19	12	3.79-3.71
15	10	-	15	16	16	-	16	-	15		72	18		8	4		4.92	19	11	3.70-3.50
14	9	13	-	15	-	15	-	-	14		71	17		9	4		4.91	19	10	3.49-3.26
											70	16		10	3		4.9	19	9	3.25-2.93
13	8	12	14	-	15	-	15	16	13		69	16		11	3		4.89	19	8	2.92-2.72
12	7	11	13	14	-	14	14	-	12		68	15		12	3		4.88	19	7	2.71-2.44
11	-	10	12	13	14	13	13	-	11		67	15		13	2		4.87	19	6	2.43-2.00
											66	15		14	2		4.86	19	5	1.99-1.61
10	6	-	-	12	13	12	12	15	10		65	14		15	2		4.85	19	4	1.60-1.43
9	-	9	11	-	-	11	11	-	9		64	14		16	2		4.84	18	3	1.42-1.31
8	5	8	10	11	12	10	10	14	8		63	14		17	1		4.83	18	2	1.30-1.07
											62	13		18	1		4.82	18	1	1.06-0
7	-	7	9	10	11	9	9	-	7		61	13		19	1		4.81	18
6	4	-	8	9	10	8	8	13	6		60	12		20	1		4.8	18
5	-	6	7	-	9	7	7	12	5		59	12		21	1		4.79	18
											58	12		22	1		4.78	18
4	3	5	6	8					4		57	11		23	1		4.77	18
4	3	5	6	7	8	6	6	11	4		56	11		24	1		4.76	18
3						5			3		55	11		25	1		4.75	18
3	-	-	5	6	7	4	5	10	3		54	11		26	1		4.74	18
											53	10		27	1		4.73	18
2				5					2		52	10		28	1		4.72	18
2	2	4	4	4	6		4	-	2		51	9		29	1		4.71	18
2		3	3	3	5	3	3		2		50	9		30	0		4.7	18
2		2	2	2	4	2	2		2		49	9		31	0		4.69	18
											48	8		32	0		4.68	18
1									1		47	8		33	0		4.67	18
1								9	1		46	8		34	0		4.66	17
1								8	1		45	8		35	0		4.65	17
1								7	1		44	7		36	0		4.64	17
1					3			6	1		43	7					4.63	17
1					2			5	1		42	7					4.62	17
1	1	1	1	1	1	1	1	4	1		41	7					4.61	17
1	0	0	0	0	0	0	0	3	1		40	6					4.6	17
0								2	0		39	6					4.59	17
0								1	0		38	6					4.58	17
0	-	-	-	-	-	-	-	0	0		37	6					4.57	17
											36	5					4.56	17
											35	5					4.55	17
											34	4					4.54	17
											33	4					4.53	17
											32	3					4.52	17
											31	3					4.51	17
											30	3					4.5	17
											29	3					4.49	17
											28	3					4.48	16
											27	2					4.47	16
											26	2					4.46	16
											25	2					4.45	16
											24	2					4.44	16
											23	2					4.43	16
											22	2					4.42	16
											21	2					4.41	16
											20	2					4.4	16
											19	2					4.39	16
											18	2					4.38	16
											17	2					4.37	16
											16	2					4.36	16
											15	2					4.35	16
											14	2					4.34	16
											13	2					4.33	16
											12	2					4.32	16
											11	2					4.31	16
											10	2					4.3	16
											9	2					4.29	15
											8	2					4.28	15
											7	1					4.27	15
											6	1					4.26	15
											5	1					4.25	15
											4	1					4.24	15
											3	1					4.23	15
											2	1					4.22	15
											1	1					4.21	15
											0	1					4.2	15
																	4.19	15
																	4.18	15
																	4.17	15
																	4.16	15
																	4.15	15
																	4.14	15
																	4.13	15
																	4.12	15
																	4.11	14
																	4.1	14
																	4.09	14
																	4.08	14
																	4.07	14
																	4.06	14
																	4.05	14
																	4.04	14
																	4.03	14
																	4.02	14
																	4.01	14
																	4	14
																	3.99	14
																	3.98	14
																	3.97	14
																	3.96	14
																	3.95	14
																	3.94	13
																	3.93	13
																	3.92	13
																	3.91	13
																	3.9	13
																	3.89	13
																	3.88	13
																	3.87	13
																	3.86	13
																	3.85	13
																	3.84	13
																	3.83	13
																	3.82	13
																	3.81	13
																	3.8	13
																	3.79	12
																	3.78	12
																	3.77	12
																	3.76	12
																	3.75	12
																	3.74	12
																	3.73	12
																	3.72	12
																	3.71	12
																	3.7	11
																	3.69	11
																	3.68	11
																	3.67	11
																	3.66	11
																	3.65	11
																	3.64	11
																	3.63	11
																	3.62	11
																	3.61	11
																	3.6	11
																	3.59	11
																	3.58	11
																	3.57	11
																	3.56	11
																	3.55	11
																	3.54	11
																	3.53	11
																	3.52	11
																	3.51	11
																	3.5	11
																	3.49	10
																	3.48	10
																	3.47	10
																	3.46	10
																	3.45	10
																	3.44	10
																	3.43	10
																	3.42	10
																	3.41	10
																	3.4	10
																	3.39	10
																	3.38	10
																	3.37	10
																	3.36	10
																	3.35	10
																	3.34	10
																	3.33	10
																	3.32	10
																	3.31	10
																	3.3	10
																	3.29	10
																	3.28	10
																	3.27	10
																	3.26	10
																	3.25	9
																	3.24	9
																	3.23	9
																	3.22	9
																	3.21	9
																	3.2	9
																	3.19	9
																	3.18	9
																	3.17	9
																	3.16	9
																	3.15	9
																	3.14	9
																	3.13	9
																	3.12	9
																	3.11	9
																	3.1	9
																	3.09	9
																	3.08	9
																	3.07	9
																	3.06	9
																	3.05	9
																	3.04	9
																	3.03	9
																	3.02	9
																	3.01	9
																	3	9
																	2.99	9
																	2.98	9
																	2.97	9
																	2.96	9
																	2.95	9
																	2.94	9
																	2.93	9
																	2.92	8
																	2.91	8
																	2.9	8
																	2.89	8
																	2.88	8
																	2.87	8
																	2.86	8
																	2.85	8
																	2.84	8
																	2.83	8
																	2.82	8
																	2.81	8
																	2.8	8
																	2.79	8
																	2.78	8
																	2.77	8
																	2.76	8
																	2.75	8
																	2.74	8
																	2.73	8
																	2.72	8
																	2.71	7
																	2.7	7
																	2.69	7
																	2.68	7
																	2.67	7
																	2.66	7
																	2.65	7
																	2.64	7
																	2.63	7
																	2.62	7
																	2.61	7
																	2.6	7
																	2.59	7
																	2.58	7
																	2.57	7
																	2.56	7
																	2.55	7
																	2.54	7
																	2.53	7
																	2.52	7
																	2.51	7
																	2.5	7
																	2.49	7
																	2.48	7
																	2.47	7
																	2.46	7
																	2.45	7
																	2.44	7
																	2.43	6
																	2.42	6
																	2.41	6
																	2.4	6
																	2.39	6
																	2.38	6
																	2.37	6
																	2.36	6
																	2.35	6
																	2.34	6
																	2.33	6
																	2.32	6
																	2.31	6
																	2.3	6
																	2.29	6
																	2.28	6
																	2.27	6
																	2.26	6
																	2.25	6
																	2.24	6
																	2.23	6
																	2.22	6
																	2.21	6
																	2.2	6
																	2.19	6
																	2.18	6
																	2.17	6
																	2.16	6
																	2.15	6
																	2.14	6
																	2.13	6
																	2.12	6
																	2.11	6
																	2.1	6
																	2.09	6
																	2.08	6
																	2.07	6
																	2.06	6
																	2.05	6
																	2.04	6
																	2.03	6
																	2.02	6
																	2.01	6
																	2	6
																	1.99	5
																	1.98	5
																	1.97	5
																	1.96	5
																	1.95	5
																	1.94	5
																	1.93	5
																	1.92	5
																	1.91	5
																	1.9	5
																	1.89	5
																	1.88	5
																	1.87	5
																	1.86	5
																	1.85	5
																	1.84	5
																	1.83	5
																	1.82	5
																	1.81	5
																	1.8	5
																	1.79	5
																	1.78	5
																	1.77	5
																	1.76	5
																	1.75	5
																	1.74	5
																	1.73	5
																	1.72	5
																	1.71	5
																	1.7	5
																	1.69	5
																	1.68	5
																	1.67	5
																	1.66	5
																	1.65	5
																	1.64	5
																	1.63	5
																	1.62	5
																	1.61	5
																	1.6	4
																	1.59	4
																	1.58	4
																	1.57	4
																	1.56	4
																	1.55	4
																	1.54	4
																	1.53	4
																	1.52	4
																	1.51	4
																	1.5	4
																	1.49	4
																	1.48	4
																	1.47	4
																	1.46	4
																	1.45	4
																	1.44	4
																	1.43	4
																	1.42	3
																	1.41	3
																	1.4	3
																	1.39	3
																	1.38	3
																	1.37	3
																	1.36	3
																	1.35	3
																	1.34	3
																	1.33	3
																	1.32	3
																	1.31	3
																	1.3	2
																	1.29	2
																	1.28	2
																	1.27	2
																	1.26	2
																	1.25	2
																	1.24	2
																	1.23	2
																	1.22	2
																	1.21	2
																	1.2	2
																	1.19	2
																	1.18	2
																	1.17	2
																	1.16	2
																	1.15	2
																	1.14	2
																	1.13	2
																	1.12	2
																	1.11	2
																	1.1	2
																	1.09	2
																	1.08	2
																	1.07	2
																	1.06	1
																	1.05	1
																	1.04	1
																	1.03	1
																	1.02	1
																	1.01	1
																	1	1
																	0.99	1
																	0.98	1
																	0.97	1
																	0.96	1
																	0.95	1
																	0.94	1
																	0.93	1
																	0.92	1
																	0.91	1
																	0.9	1
																	0.89	1
																	0.88	1
																	0.87	1
																	0.86	1
																	0.85	1
																	0.84	1
																	0.83	1
																	0.82	1
																	0.81	1
																	0.8	1
																	0.79	1
																	0.78	1
																	0.77	1
																	0.76	1
																	0.75	1
																	0.74	1
																	0.73	1
																	0.72	1
																	0.71	1
																	0.7	1
																	0.69	1
																	0.68	1
																	0.67	1
																	0.66	1
																	0.65	1
																	0.64	1
																	0.63	1
																	0.62	1
																	0.61	1
																	0.6	1
																	0.59	1
																	0.58	1
																	0.57	1
																	0.56	1
																	0.55	1
																	0.54	1
																	0.53	1
																	0.52	1
																	0.51	1
																	0.5	1
																	0.49	1
																	0.48	1
																	0.47	1
																	0.46	1
																	0.45	1
																	0.44	1
																	0.43	1
																	0.42	1
																	0.41	1
																	0.4	1
																	0.39	1
																	0.38	1
																	0.37	1
																	0.36	1
																	0.35	1
																	0.34	1
																	0.33	1
																	0.32	1
																	0.31	1
																	0.3	1
																	0.29	1
																	0.28	1
																	0.27	1
																	0.26	1
																	0.25	1
																	0.24	1
																	0.23	1
																	0.22	1
																	0.21	1
																	0.2	1
																	0.19	1
																	0.18	1
																	0.17	1
																	0.16	1
																	0.15	1
																	0.14	1
																	0.13	1
																	0.12	1
																	0.11	1
																	0.1	1
																	0.09	1
																	0.08	1
																	0.07	1
																	0.06	1
																	0.05	1
																	0.04	1
																	0.03	1
																	0.02	1
																	0.01	1
																	0	1

## Sheet: ss to T
Scaled Score	T1	T2	T3	T4	T5	Total Learn	SDFR	LDFR	Hits	FP	D Prime	Bias		Scaled Score	Age	Educ	Sex
19	81.169		86.1304	89.032		99.7112					83.1829	82.9024		19	65	12	1
18	77.7226	92.3025	81.9486	84.4128		94.8762					79.7765	79.7182		18	65	12	1
17	74.2763	86.8616	77.7669	79.7937		90.0412					76.3702	76.5339		17	65	12	1
			6.67701	1.26773											65	12	1
16	70.8299	81.4208	73.5851	75.1745		85.2062	91.9466				72.9639	73.3497		16	65	12	1
15	67.3835	75.98	69.4033	70.5553	74.0903	80.3712		73.0343			69.5575	70.1655		15	65	12	1
14	63.9371	70.5391	65.2216	65.9361		75.5361	80.7489				66.1512	66.9813		14	65	12	1
			6.67701	1.26773											65	12	1
13	60.4908	65.0983	61.0398	61.317	65.9334	70.7011	75.15	65.3085	58.358	65.2253	62.7448	63.7971		13	65	12	1
12	57.0444	59.6575	56.8581	56.6978		65.8661		61.4457			59.3385	60.6129		12	65	12	1
11	53.598	54.2166	52.6763	52.0786	57.3751	61.0311	63.9523	57.5828			55.9321	57.4287		11	65	12	1
			6.67701	1.26773											65	12	1
10	50.1516	48.7758	48.4946	47.4595	53.096	56.1961	58.3535	53.7199	48.9915	55.4331	52.5258	54.2445		10	65	12	1
9	46.7053	43.335	44.3128	42.8403		51.3611	52.7546	49.8571			49.1195	51.0603		9	65	12	1
8	43.2589	37.8942	40.1311	38.2211	44.5377	46.526	47.1558	45.9942	42.7472	48.9049	45.7131	47.8761		8	65	12	1
			6.67701	1.26773											65	12	1
7	39.8125	32.4533	35.9493	33.6019	40.2585	41.691	41.5569	42.1313		45.6408	42.3068	44.6919		7	65	12	1
6	36.3661	27.0125	31.7675	28.9828	35.9793	36.856	35.9581	38.2685	36.5029	42.3768	38.9004	41.5077		6	65	12	1
5	32.9198	21.5717	27.5858	24.3636	31.7002	32.021	30.3592	34.4056	33.3808	39.1127	35.4941	38.3235		5	65	12	1
			6.67701	1.26773											65	12	1
4	29.4734	16.1308	23.404	19.7444	27.421	27.186	24.7604	30.5427		35.8486	32.0877	35.1393		4	65	12	1
3	26.027	10.69	19.2223	15.1252	23.1419	22.351	19.1615	26.6799	27.1365	32.5845	28.6814	31.9551		3	65	12	1
2	22.5806	5.24918	15.0405	10.5061	18.8627	17.5159	13.5627	22.817		29.3205	25.2751	28.7709		2	65	12	1
			6.67701	1.26773											65	12	1
1	19.1343	-0.191653	10.8588	5.8869	14.5836	12.6809	7.96381	18.9541	20.8922	26.0564	21.8687	25.5867		1	65	12	1
0				1.26773					17.77	22.7923				0	65	12	1
